# Supplementary material for: A silicon nanoparticle-based nanoprobe for ratiometric fluorescence and visual detection of glucose
Source: Royal Society of Chemistry journal article supplement (doi:10.1039/d1nj03826e), 2021-01-01
Supplement: d1nj03826e1.pdf [file d1nj03826e1.pdf]

**A silicon nanoparticles-based nanoprobe for fluorescence ratiometric  
and visual detection of glucose**

*Chunlei Yang, Na Gao, Yazhou Liu, Hengzhi Zhao, Jing Jing, Xiaoling Zhang\**

Key Laboratory of Medical Molecule Science and Pharmaceutics Engineering,  
Ministry of Industry and Information Technology, Key Laboratory of Cluster Science  
of Ministry of Education, Beijing Key Laboratory of Photoelectronic/Electrophotonic  
Conversion Materials, School of Chemistry and Chemical Engineering.

Beijing Institute of Technology, Beijing, 100081, P.R. China.

E-mail addresses: zhangxl@bit.edu.cn (Xiaoling Zhang), hellojane@bit.edu.cn (Jing  
Jing).

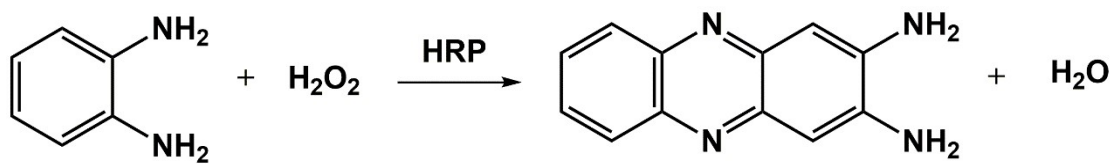

**Scheme S1** The oxidized route of OPD for 2,3-diaminophenazine (oxOPD) with  $\text{H}_2\text{O}_2$  and HRP.

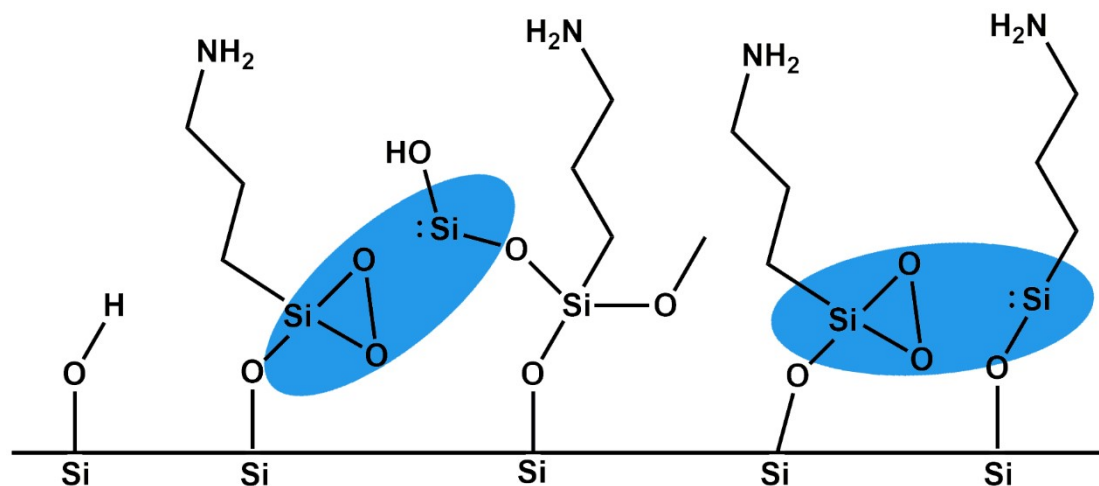

**Scheme S2** Defect pairs generation on the surface of SiNPs (Modified by Ref. [1] )

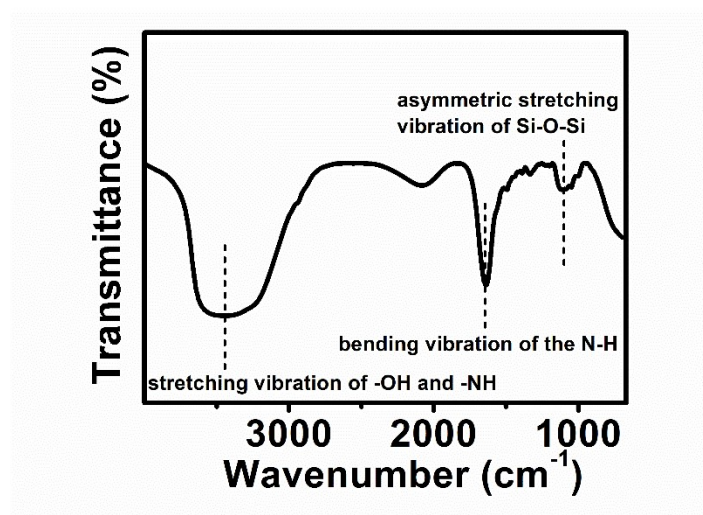

**Fig. S1** FTIR spectrum of the SiNPs.

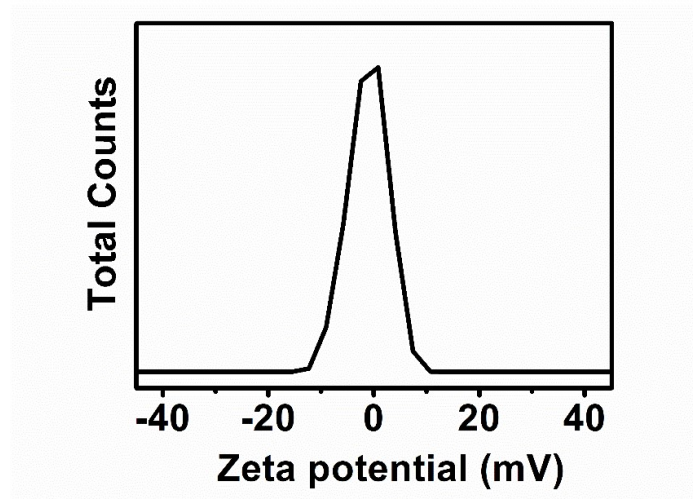

Fig. S2 Zeta potential of SiNPs dispersed in water.

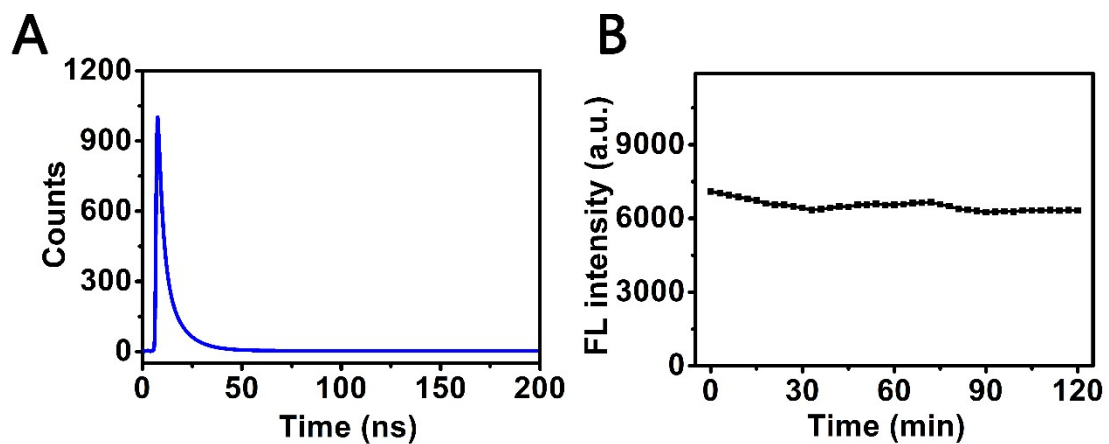

Fig. S3 (A) Fluorescence lifetime decay curves of SiNPs. (B) The fluorescence intensity of SiNPs under excitation of 355 nm with prolonged time.

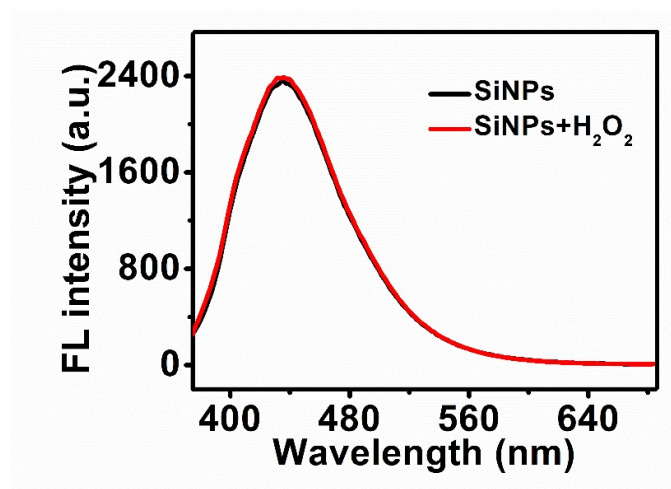

Fig. S4 The fluorescence spectra of SiNPs and SiNPs with  $H_2O_2$ .

**Table S1.** Comparison of reported fluorescence methods for glucose detection

| Detection methods                            | Detection limit<br>( $\mu\text{M}$ ) | Signal output | References |
|----------------------------------------------|--------------------------------------|---------------|------------|
| CuNPs                                        | 50                                   | turn off      | [2]        |
| CdTe/CdS quantum dots-<br>GOx                | 100                                  | turn off      | [3]        |
| Boron-doped graphene quantum<br>dots (BGQDs) | 30                                   | turn on       | [4]        |
| CuNCs in alginate                            | 32                                   | turn on       | [5]        |
| AgNC-GOx/Ag <sup>+</sup> -FP                 | 50                                   | turn on       | [6]        |
| PNAS-APBA-ARS@Ova-AuNCs                      | 100                                  | ratiometric   | [7]        |
| SiNPs/OPD/HRP/GOx                            | 6.8                                  | ratiometric   | this work  |

## References

- [1] J. Yoo, S. Han, W. Park, T. Lee, Y. Park, H. Chang, S. K. Hahn and W. Kwon, *ACS Appl. Mater. Inter.*, 2018, **10**, 44247-44256.
- [2] Z. Mao, Z. Qing, T. Qing, F. Xu, L. Wen, X. He, D. He, H. Shi and K. Wang, *Anal Chem*, 2015, **87**, 7454-7460.
- [3] L. Ding, B. Zhang, C. Xu, J. Huang and Z. Xia, *Anal. Methods*, 2016, **8**, 2967-2970.
- [4] L. Zhang, Z. Y. Zhang, R. P. Liang, Y. H. Li and J. D. Qiu, *Anal Chem*, 2014, **86**, 4423-4430.
- [5] S. Gou, Y. E. Shi, P. Li, H. Wang, T. Li, X. Zhuang, W. Li and Z. Wang, *ACS Appl. Mater. Inter.*, 2019, **11**, 6561-6567.
- [6] S. Jiang, Y. Zhang, Y. Yang, Y. Huang, G. Ma, Y. Luo, P. Huang and J. Lin, *ACS Appl. Mater. Inter.*, 2019, **11**, 10554-10558.
- [7] L. L. Wang, J. Qiao, H. H. Liu, J. Hao, L. Qi, X. P. Zhou, D. Li, Z. X. Nie and L. Q. Mao, *Anal Chem*, 2014, **86**, 9758-9764.
